# Supplementary material for: Novel pH-sensitive gum ghatti-cl-poly(acrylic acid) composite hydrogel based on graphene oxide for metformin hydrochloride and sodium diclofenac combined drug-delivery systems
Source: Royal Society of Chemistry journal article supplement (doi:10.1039/d3pm00072a), 2024-01-01
Supplement: d3pm00072a1.pdf [file d3pm00072a1.pdf]

**A novel pH sensitive Gum ghatti-*cl-poly*(Acrylic acid) Composite Hydrogel based on Graphene Oxide for Metformin Hydrochloride and Sodium Diclofenac Combined Drug Delivery Systems**

Pragnesh N Dave<sup>1\*</sup>, Pradip M. Macwan<sup>2</sup>

1 Department of Chemistry, Sardar Patel University, Vallabh Vidyangar-388 120, Gujarat, India

2 B. N. Patel Institute of Paramedical & Science (Science Division), Sardar Patel Education Trust, Bhalej Road, Anand - 388001, Gujarat, India.

\*Corresponding author: pragnesh7@yahoo.com

**Supplementary Information**

**Table S1** Comparison of various drug delivery systems involving different hydrogels with their mechanism of release at different pH.

| <b>Sr. No.</b> | <b>Hydrogels</b>                                                       | <b>Polymerization technique</b>                                              | <b>pH of release</b> | <b>Model Drugs</b>                     | <b>Kinetic model/mechanism</b>                    | <b>Ref.</b> |
|----------------|------------------------------------------------------------------------|------------------------------------------------------------------------------|----------------------|----------------------------------------|---------------------------------------------------|-------------|
| 1.             | Gum ghatti-co-poly(acrylic acid-aniline) (Gg-co-poly(AA-ANI))          | Graft copolymerization                                                       | 9.2                  | Amoxicillin trihydrate                 | Non-Fickian                                       | [1]         |
| 2.             | Gum tragacanth and acrylic acid [Gt-cl-poly(AA)]                       | graft copolymerization                                                       | 9.2                  | Pantoprazole sodium                    | Case II diffusion mechanism                       | [2]         |
| 3.             | Gum ghatti-g-poly(acrylic acid-aniline) [Gg-g-poly(AA-IPN-ANI)]        | Free radical polymerization                                                  | 9.2                  | Amoxicillin trihydrate and Paracetamol | Fickian type                                      | [3]         |
| 4.             | Gum tragacanth, poly(acrylic acid) (PAA), and poly(acrylamide) (PAAm), |                                                                              | 9.2                  | Losartan potassium                     | Non-fickian                                       | [4]         |
| 5.             | Chitosan graft Acrylamide microsphere (CS-g-AAm)                       | Free radical polymerization                                                  | 6.8                  | Nitrendipine                           | Quasi-diffusion                                   | [5]         |
| 6.             | Chit-g-polymer (NIPAAM-co-AA) and Chit-g-polymer (NIPAAM-co-AN)        | Graft copolymerization                                                       | 9.4                  | Diclofenac sodium                      | non-Fickian diffusion                             | [6]         |
| 7.             | (pNIPAAm–chitosan–PVA)                                                 | Freezing and thawing followed by gamma irradiation at a total dose of 20 kGy | 9                    | Metformin HCl                          | -                                                 | [7]         |
| 8.             | Montmorillonite clay                                                   | -                                                                            | 7.4                  | Diclofenac sodium                      | Anomalous diffusion or non-Fickian diffusion      | [8]         |
| 9.             | Poly(methyl methacrylate)-grafted-ghatti gum (GG-g-PMMA)               | Free radical polymerization                                                  | 6.8                  | Metformin HCl                          | Fickian diffusion and/or polymeric matrix erosion | [9]         |

|     |                                                               |                              |     |                                               |                                                                                    |      |
|-----|---------------------------------------------------------------|------------------------------|-----|-----------------------------------------------|------------------------------------------------------------------------------------|------|
| 10. | NIPA:AAc                                                      | Free radical polymerization  | 6.8 | Ofloxacin                                     | non-Fickian transport                                                              | [10] |
| 11. | GGI-g-PAM-cl-MBA                                              | microwave                    | 7.4 | 5-Fluorouracil                                | Non-Fickian irregular diffusion                                                    | [11] |
| 12. | Gum tragacanth-acrylic Acid (Gt-cl-poly(AA))                  | surface methodology approach | 9.2 | Cetirizine dihydrochloride                    | non-Fickian                                                                        | [12] |
| 13. | Poly-n-isopropylacrylamide (P(NIPA))-based gels (PNIPA-co-AM) | -                            | -   | Prodigiosin                                   | Fickian (case I) ( $n = 0.45$ ) and non-Fickian diffusion (case II) ( $n > 0.45$ ) | [13] |
| 14. | SA/CMCS-ZnO                                                   | -                            | 7.4 | Diclofenac sodium                             | anomalous-transport                                                                | [14] |
| 15. | Gg-cl-poly(NIPAcO-AA)/CoFe <sub>2</sub> O <sub>4</sub>        | free radical polymerization  | 7.4 | Metformin hydrochloride                       | Specific case II transport                                                         | [15] |
| 16. | Gg-cl-poly(NIPA-co-AA)/-o-MWCNT                               | Free radical polymerization  | 9.2 | Metformin hydrochloride and Sodium Diclofenac | Fickian                                                                            | [16] |
| 17. | Gum ghatti-cl-poly(AA)/-o-MWCNT                               | Free radical polymerization  | 7.4 | Sodium Diclofenac                             | Fickian diffusion (Case-I diffusional)                                             | [17] |
| 18. | gum ghatti-cl-poly(AA-co-NIPAm)/GO                            |                              | 7.4 | Metformin hydrochloride and Sodium Diclofenac | Fickian                                                                            | [18] |

**Table S2.** Different types of hydrogel systems with their applications.

| Sr No | Type of Hydrogels              | Applications                                                                         | Ref  |
|-------|--------------------------------|--------------------------------------------------------------------------------------|------|
| 1     | pH-stimuli Hydrogels           | Oral Drug Delivery                                                                   | [19] |
|       |                                | Non-cellulosic biopolymer for drug delivery                                          | [20] |
|       |                                | Smart hydrogel from psyllium ( <i>Plantago ovata</i> ) for intelligent drug delivery | [21] |
|       |                                | Tissue engineering and other biomedical applications                                 | [22] |
|       |                                | Fabrication and biomedical                                                           | [23] |
| 2     | Photosensitive Hydrogels       | In Vitro Photodynamic Therapy of Breast Cancer                                       | [24] |
|       |                                | Targeted drug delivery and 4D cell culture                                           | [25] |
|       |                                | Light- thermo-pH-salt coupled stimuli for biomedical applications                    | [26] |
|       |                                | Peptide hydrogels as smart materials                                                 | [27] |
|       |                                | Cancer therapy                                                                       | [28] |
| 3     | Injectable hydrogel            | Therapeutic agents for disease treatment and tissue engineering                      | [29] |
|       |                                | Soft tissues drug delivery                                                           | [30] |
|       |                                | Drug delivery and tissue engineering applications                                    | [31] |
| 4     | Magnetism-Responsive Hydrogels | Hyperthermia and Drug Delivery                                                       | [32] |
|       |                                | Soft tissue injuries                                                                 | [33] |
| 5     | Thermo-stimuli Hydrogel        | Chemo-/photothermal therapy monitored by cell imaging                                | [34] |
|       |                                | Tissue regeneration                                                                  | [35] |
|       |                                | Smart drug delivery                                                                  | [36] |
| 6     | Shear-sensitive hydrogels      | Rheological and biological evaluation Sana                                           | [37] |
|       |                                | Biomedical                                                                           | [38] |

**Table S3.** General characteristic properties of Gum ghatti.

|                     |                                                 |
|---------------------|-------------------------------------------------|
| Physical appearance | Pale yellow to light brown, free flowing powder |
| Loss on drying      | NMT 10                                          |
| Optical rotation    | -30 to -40°                                     |
| Colour of slurry    | Light brown                                     |
| Specific gravity    | 1.02–1.10                                       |
| Clarity of solution | Slightly hazy                                   |
| pH (25 % solution)  | 4.0–4.5                                         |
| Heavy metals        | 20 ppm                                          |

## References

- [1] K. Sharma, V. Kumar, B. Chaudhary, B. S. Kaith, S. Kalia, and H. C. Swart, "Application of biodegradable superabsorbent hydrogel composite based on Gum ghatti-co-poly(acrylic acid-aniline) for controlled drug delivery," *Polym. Degrad. Stab.*, vol. 124, pp. 101–111, 2016, doi: 10.1016/j.polymdegradstab.2015.12.021.
- [2] B. S. Kaith, R. Jindal, and G. S. Kapur, "Journal of the Chinese Advanced Materials Society Synthesis of Gum tragacanth and acrylic acid based hydrogel : its evaluation for controlled release of antiulcerative drug pantoprazole sodium," no. September, pp. 37–41, 2014, doi: 10.1080/22243682.2014.911114.
- [3] K. Sharma, V. Kumar, S. Kaith, V. Kumar, and S. Som, "Evaluation of a conducting interpenetrating network based on gum ghatti- g -poly(acrylic acid-aniline) as a colon-specific delivery system for amoxicillin trihydrate and paracetamol," pp. 3021–3034, 2015, doi: 10.1039/c4nj01982b.
- [4] Saruchi, B. S. Kaith, R. Jindal, V. Kumar, and M. S. Bhatti, "Optimal response surface design of Gum tragacanth-based poly[(acrylic acid)-co-acrylamide] IPN hydrogel for the controlled release of the antihypertensive drug losartan potassium," *RSC Adv.*, vol. 4, no. 75, pp. 39822–39829, 2014, doi: 10.1039/c4ra02803a.
- [5] S. S. Geeva Prasanth A, Sathish Kumar A, Sai Shruthi B, "Kinetic study and in vitro drug release studies of nitrendipine loaded arylamide grafted chitosan blend microspheres," *Mater. Res. Express*, 2019, doi: 10.1088/2053-1591/ab5811 Manuscript.
- [6] L. Chopra *et al.*, "Comparative Drug Release Investigations for Diclofenac Sodium Drug (DS) by Chitosan-Based Grafted and Crosslinked Copolymers," *Materials (Basel)*, vol. 15, no. 7, pp. 1–17, 2022, doi: 10.3390/ma15072404.
- [7] D. R. Barleany, C. V. Ananta, F. Maulina, A. Rochmat, H. Alwan, and Erizal, "Controlled release of metformin hydrogen chloride from stimuli-responsive hydrogel based on poly(N-Isopropylacrylamide)/Chitosan/Polyvinyl alcohol composite," *Int. J. Technol.*, vol. 11, no. 3, pp. 511–521, 2020, doi: 10.14716/ijtech.v11i3.2330.
- [8] M. Kaur and M. Datta, "Diclofenac sodium adsorption onto montmorillonite: Adsorption equilibrium studies and drug release kinetics," *Adsorpt. Sci. Technol.*, vol. 32, no. 5, pp. 365–387, 2014, doi: 10.1260/0263-6174.32.5.365.
- [9] R. R. Bhosale *et al.*, "Ghatti gum-base graft copolymer: A plausible platform for pH-controlled delivery of antidiabetic drugs," *RSC Adv.*, vol. 11, no. 24, pp. 14871–14882, 2021, doi: 10.1039/d1ra01536b.
- [10] J. C. Cuggino, C. B. Contreras, A. Jimenez-Kairuz, B. A. Maletto, and C. I. Alvarez Igarzabal, "Novel poly(NIPA-co-AAc) functional hydrogels with potential application in drug controlled release," *Mol. Pharm.*, vol. 11, no. 7, pp. 2239–2249, 2014, doi: 10.1021/mp400615n.
- [11] P. Pal, S. K. Singh, S. Mishra, J. P. Pandey, and G. Sen, "Gum ghatti based hydrogel: Microwave synthesis, characterization, 5-Fluorouracil encapsulation and 'in vitro' drug release evaluation," *Carbohydr. Polym.*, vol. 222, no. May, 2019, doi: 10.1016/j.carbpol.2019.114979.
- [12] B. S. Kaith, Saruchi, R. Jindal, and M. S. Bhatti, "Screening and RSM optimization for

- synthesis of a Gum tragacanth-acrylic acid based device for in situ controlled cetirizine dihydrochloride release,” *Soft Matter*, vol. 8, no. 7, pp. 2286–2293, 2012, doi: 10.1039/c2sm07033b.
- [13] Y. Danyuo, C. J. Ani, A. A. Salifu, J. D. Obayemi, and V. O. Obanawu, “Anomalous Release Kinetics of Prodigiosin from Poly-N-Isopropyl- Acrylamid based Hydrogels for The Treatment of Triple Negative Breast Cancer,” *Sci. Rep.*, no. September 2018, pp. 1–14, 2019, doi: 10.1038/s41598-019-39578-4.
- [14] Y.-Y. F. Baolong Niu, Jianhong Jia, Heping Wang, Siyu Chen, Wenling Cao, Jianghao Yan, Xuechen Gong, Xiaojie Lian, Wenfeng Li, “In vitro and in vivo release of diclofenac sodium-loaded sodium alginate/carboxymethyl chitosan-ZnO hydrogel beads Baolong,” *Int. J. Biol. Macromol.*, 2019, doi: 10.1016/j.ijbiomac.2019.09.059.
- [15] P. N. Dave, P. M. Macwan, and B. Kamaliya, “Drug release and thermal properties of magnetic cobalt ferrite (CoFe<sub>2</sub>O<sub>4</sub>) nanocomposite hydrogels based on poly(acrylic acid-g-N-isopropyl acrylamide) grafted onto gum ghatti,” *Int. J. Biol. Macromol.*, vol. 224, no. September, pp. 358–369, 2023, doi: 10.1016/j.ijbiomac.2022.10.129.
- [16] B. P. K. Pragnesh N. Dave, Pradip M. Macwan, “Biodegradable Gg- cl -poly ( NIPAm- co -AA )/ - o - delivery system of metformin and sodium diclofenac : in vitro studies,” *RSC Adv.*, pp. 22875–22885, 2023, doi: 10.1039/d3ra04728h.
- [17] P. N. Dave, P. M. Macwan, and B. Kamaliya, “Preparation and Enhancing Properties of pH-Sensitive Hydrogel in Light of Gum Ghatti-cl-poly(acrylic acid)/ – o-MWCNT for Sodium Diclofenac Drug Release,” *Macromolecular Chemistry and Physics*, vol. 224, no. 12. 2023. doi: 10.1002/macp.202300038.
- [18] P. N. Dave, P. M. Macwan, and B. Kamaliya, “Synthesis and characterization of biodegradable gum ghatti- cl - poly ( AA- co -NIPAm )/ GO based hydrogel for metformin and sodium diclofenac combined drug delivery system,” *Colloids Surfaces A Physicochem. Eng. Asp. J.*, vol. 673, no. May, pp. 131815–131826, 2023, doi: 10.1016/j.colsurfa.2023.131815.
- [19] X. J. ZHE ZHANG, LI CHEN, MINGXIAO DENG, 1 YUNYAN BAI, XUESI CHEN, “Biodegradable Thermo- and pH-Responsive Hydrogels for Oral Drug Delivery,” *J. Polym. Sci. Part A Polym. Chem.*, vol. 49, no. April, pp. 2941–2951, 2011, doi: 10.1002/pola.24730.
- [20] U. Vegad, M. Patel, D. Khunt, O. Zupančič, S. Chauhan, and A. Paudel, “pH stimuli-responsive hydrogels from non-cellulosic biopolymers for drug delivery,” *Front. Bioeng. Biotechnol.*, vol. 11, no. September, pp. 1–12, 2023, doi: 10.3389/fbioe.2023.1270364.
- [21] J. Irfan *et al.*, “A pH-sensitive, stimuli-responsive, superabsorbent, smart hydrogel from psyllium (: *Plantago ovata*) for intelligent drug delivery,” *RSC Adv.*, vol. 11, no. 32, pp. 19755–19767, 2021, doi: 10.1039/d1ra02219a.
- [22] H. M. El-Husseiny *et al.*, “Smart/stimuli-responsive hydrogels: Cutting-edge platforms for tissue engineering and other biomedical applications,” *Mater. Today Bio*, vol. 13, no. November 2021, 2022, doi: 10.1016/j.mtbio.2021.100186.
- [23] Z. Li, Y. Zhou, T. Li, J. Zhang, and H. Tian, “Stimuli-responsive hydrogels: Fabrication and biomedical applications,” *View*, vol. 3, no. 2. 2022. doi: 10.1002/VIW.20200112.

- [24] M. H. Bahareh Rostaminejad , Ali Reza Karimi , Mohammad Dinari, “Photosensitive Chitosan-Based Injectable Hydrogel Chemically Cross-Linked by Perylene Bisimide Dopamine with Robust Antioxidant and Cytotoxicity Enhancer Properties for In Vitro Photodynamic Therapy of Breast Cancer,” *ACS Appl Bio Mater .*, vol. 6, no. 3, pp. 1242–1251, 2023, doi: 10.1021/acsabm.2c01086.
- [25] E. R. Ruskowitz and C. A. Deforest, “Photoresponsive biomaterials for targeted drug delivery and 4D cell culture,” *Nat. Rev. Mater.*, vol. 3, 2018, doi: 10.1038/natrevmats.2017.87.
- [26] X. Chen, H. Li, K. Y. Lam, H. Li, and K. Y. Lam, “A multiphysics model of photo-sensitive hydrogels in response to light-ther- mo-pH-salt coupled stimuli for biomedical applications,” *Bioelectrochemistry*, 2020, doi: 10.1016/j.bioelechem.2020.107584.
- [27] X. Xie *et al.*, “Photosensitive peptide hydrogels as smart materials for applications,” *Chinese Chem. Lett.*, 2018, doi: 10.1016/j.ccllet.2018.04.030.
- [28] P. Pan *et al.*, “Photosensitive drug delivery systems for cancer therapy : Mechanisms and applications,” vol. 338, no. August, pp. 446–461, 2021.
- [29] J. H. Lee, “InjectaLee, J. H. (2018). Injectable hydrogels delivering therapeutic agents for disease treatment and tissue engineering. *Biomaterials Research*, 22, 1–14. <https://doi.org/10.1186/s40824-018-0138-6> ble hydrogels delivering therapeutic agents for disease tr,” *Biomater. Res.*, vol. 22, pp. 1–14, 2018.
- [30] V. Pertici *et al.*, “Degradable and Injectable Hydrogel for Drug Delivery in Soft Tissues,” *Biomacromolecules*, vol. 20, no. 1, pp. 149–163, 2019, doi: 10.1021/acs.biomac.8b01242.
- [31] Y. Sun, D. Nan, H. Jin, and X. Qu, “Recent advances of injectable hydrogels for drug delivery and tissue engineering applications,” *Polym. Test.*, vol. 81, 2020, doi: 10.1016/j.polymertesting.2019.106283.
- [32] S. Ganguly and S. Margel, “Design of magnetic hydrogels for hyperthermia and drug delivery,” *Polymers (Basel)*., vol. 13, no. 23, 2021, doi: 10.3390/polym13234259.
- [33] L. Zhang *et al.*, “Synergistic therapy of magnetism-responsive hydrogel for soft tissue injuries,” *Bioact. Mater.*, vol. 4, no. March 2019, pp. 160–166, 2019, doi: 10.1016/j.bioactmat.2019.03.002.
- [34] J. W. Yang Shu, Rusheng Song, Anqi Zheng, Jingli Huang, Mingli Chen, “Thermo/pH dual-stimuli-responsive drug delivery for chemo-/photothermal therapy monitored by cell imaging,” *Talanta*, vol. 115, 2018, doi: 10.1016/j.talanta.2018.01.018.
- [35] H. A. J. Alyeh Abdollahi , Atefeh Malek-Khatabi , Malihe Sadat Razavi , Mojgan Sheikhi , Koorosh Abbaspour , Zahra Rezaghali , Ali Atashi , Milad Rahimzadegan , Mohammadsaleh Sadeghi, “The recent advancement in the chitosan-based thermosensitive hydrogel for tissue regeneration,” *J. Drug Delicery Sci. Technol.*, vol. 104627, 2023, doi: 10.1016/j.jddst.2023.104627.
- [36] H. K. Farzad Rahmani , Rabi Atabaki , Setareh Behrouzi , Farnoosh Mohamadpour, “The recent advancement in the PLGA-based thermo-sensitive hydrogel for smart drug delivery,” *Int. J. Pharm.*, vol. 631, p. 122484, 2023, doi: 10.1016/j.ijpharm.2022.122484.

- [37] H. Sana Pirmardvand Chegini, Jaleh Varshosaz and M. M. Mirmohammad Sadeghi, Alireza Dehghani, "Shear sensitive injectable hydrogels of cross-linked tragacanthic acid for ocular drug delivery: Rheological and biological evaluation," *Int. J. Biol. Macromol.*, 2020, doi: /10.1016/j.ijbiomac.2020.10.164.
- [38] J. A. B. Selen Uman, Abhishek Dhand, "Recent advances in shear-thinning and self-healing hydrogels for biomedical applications.pdf," *J. Appl. Polym. Sci.*, 2019, doi: 10.1002/app.48668.
